# Supplementary material for: DHHC5-mediated palmitoylation of S1P receptor subtype 1 determines G-protein coupling
Source: PubMed Central journal article supplement (PMC5707436; doi:10.1038/s41598-017-16457-4), 2017-11-29
Supplement: 41598_2017_16457_MOESM1_ESM.pdf [file 41598_2017_16457_MOESM1_ESM.pdf]

**DHHC5-mediated palmitoylation of S1P receptor subtype 1 determines G-protein coupling**

Shaymaa Mohamed Mohamed Badawy\*, Taro Okada\*, Taketoshi Kajimoto, Takeshi Ijuin & Shun-ichi Nakamura<sup>1</sup>

Division of Biochemistry, Department of Biochemistry and Molecular Biology, Kobe University Graduate School of Medicine, Kobe 650-0017, Japan.

<sup>1</sup>Corresponding author: [snakamur@kobe-u.ac.jp](mailto:snakamur@kobe-u.ac.jp)

\*These authors contributed equally to this work.

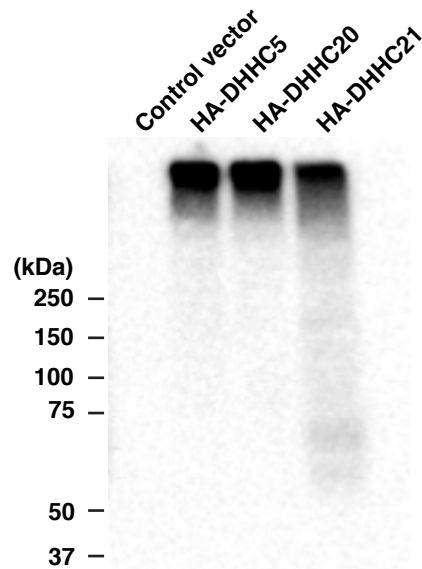

**Supplementary Figure 1. Expression of siRNA-resistant DHHC enzymes.**

SH-SY5Y cells transiently transfected with vectors encoding siRNA-resistant HA-DHHC5, HA-DHHC20, or HA-DHHC21 were cultured for 72 hr. After cell lysis, the lysates were analysed by immunoblotting anti-HA antibody. Note that DHHC enzymes are highly self-aggregatable and subjected to temperature and reducing agents during preparation of the samples (Kokkola, T. et al. Somatostatin receptor 5 is palmitoylated by the interacting ZDHHC5 palmitoyltransferase. *FEBS Lett.* 585:2665-2670 (2011)). Therefore, expression of each protein was evaluated by the amount of high molecular weight-band compared with the control vector treatment.

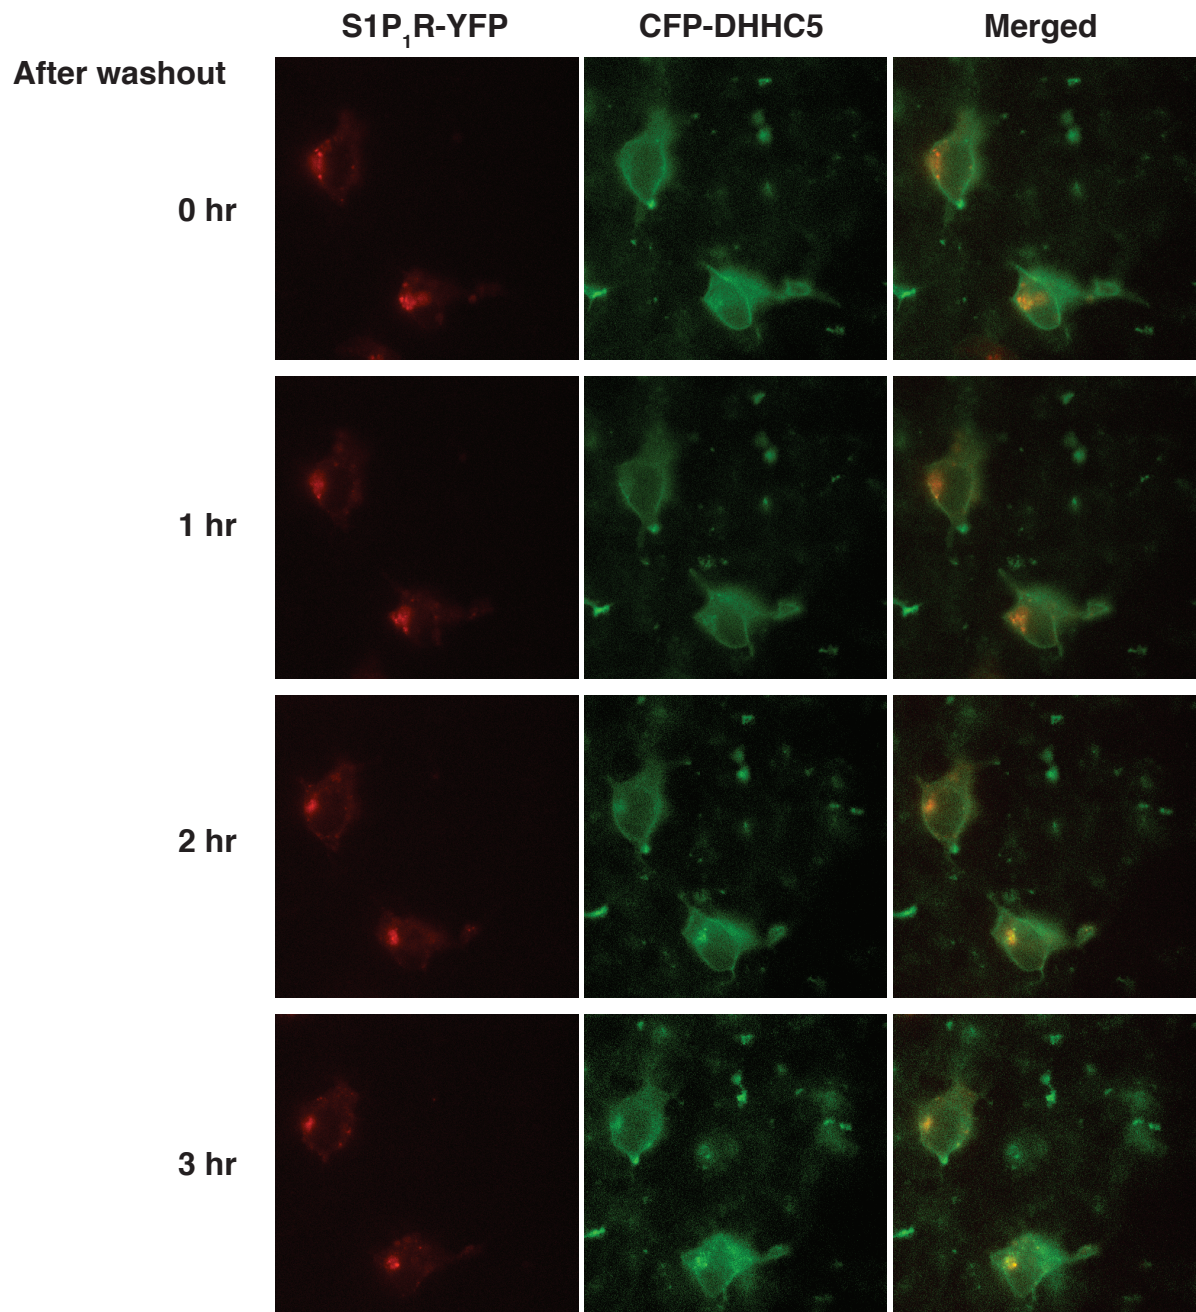

**Supplementary Figure 2. Internalisation of DHHC5 during washout processes after prolonged (1 hr) treatment of FTY720-P.**

SH-SY5Y cells transiently expressing both S1P<sub>1</sub>R-CFP and DHHC5-YFP were stimulated with 10 nM FTY720-P for 1 hr. After cells were cultured in agonist-free media (washout), cells were sequentially monitored using a fluorescence microscope equipped with time-lapse recording system. Images were captured every hour for 3 hrs. One of the representative results from three independent experiments is shown.

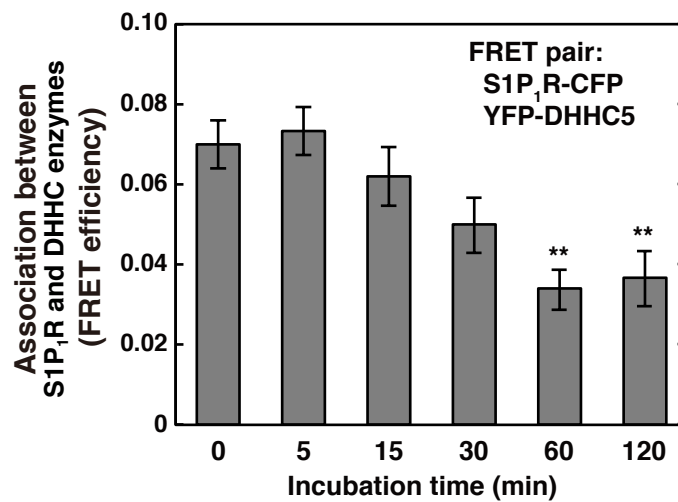

**Supplementary Figure 3. S1P-induced dissociation of DHC5 from S1P<sub>1</sub>R in a time-dependent manner.**

SH-SY5Y cells transiently expressing both S1P<sub>1</sub>R-CFP and DHC5-YFP were stimulated with 100 nM S1P for the indicated time periods. Cells were then fixed and analysed for FRET efficiencies. Values represent means  $\pm$  s.e.m. of 3 independent experiments carried out in triplicate. Statistical significance was analysed by Student's *t*-test (\*\**P* < 0.01 versus 0 time).

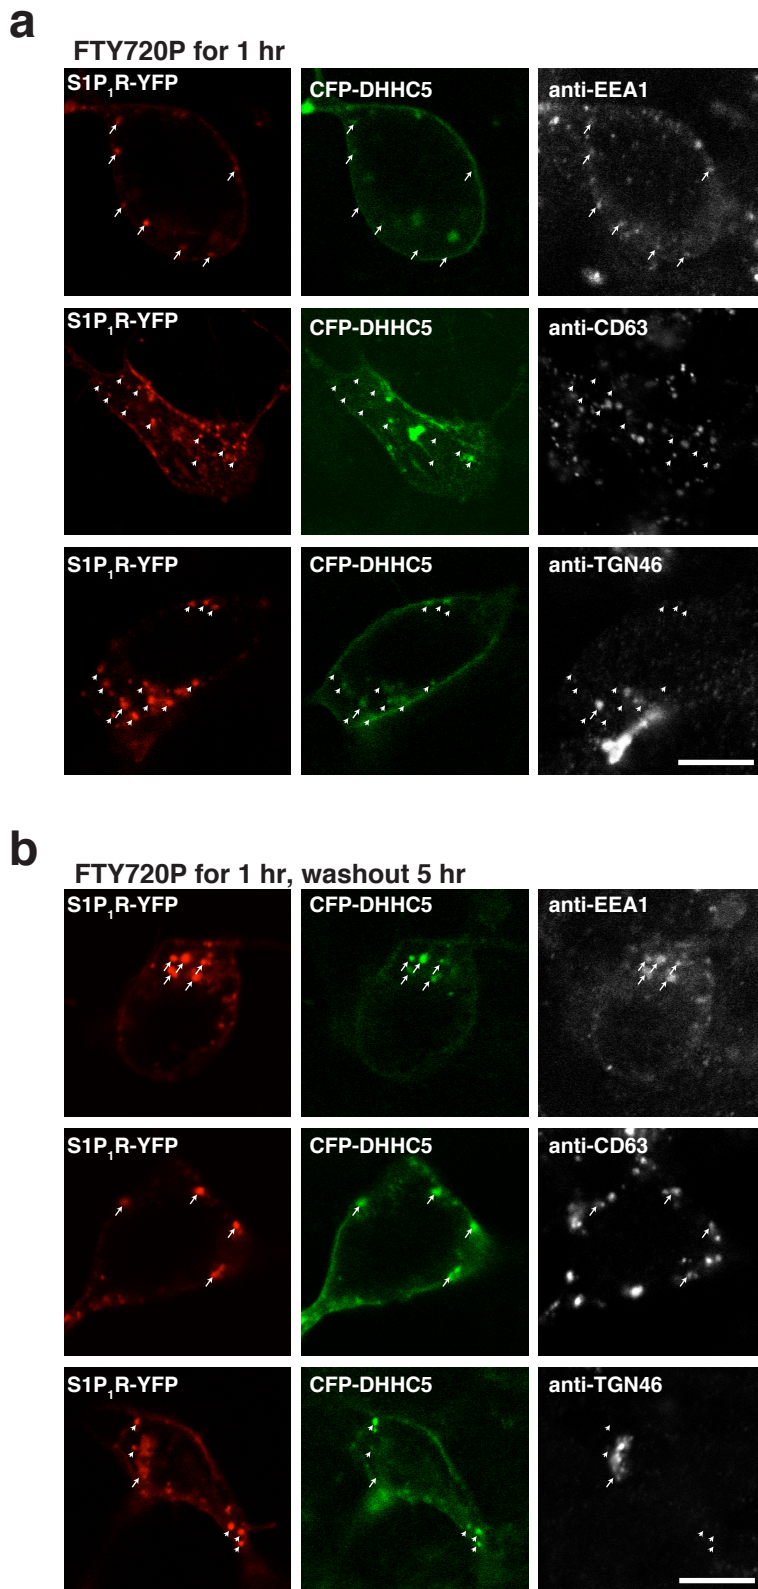

**Supplementary Figure 4. Characterisation of FTY720-P-induced internalised vesicles with several vesicle markers.**

(a) SH-SY5Y cells transiently expressing both S1P<sub>1</sub>R-YFP and DHHC5-CFP were stimulated with 10 nM FTY720-P for 1 hr. After fixation, cells were immunostained with anti-EEA1, anti-CD63, or anti-TGN46 antibody and analysed by confocal microscopy. Scale bars, 10  $\mu$ m.

(b) After prolonged incubation with FTY720-P as in (a), the culture media were changed with the ones washout agonist and cultured for additional 5 hrs. The cells were treated as above and analysed by confocal microscopy. Scale bars, 10  $\mu$ m.

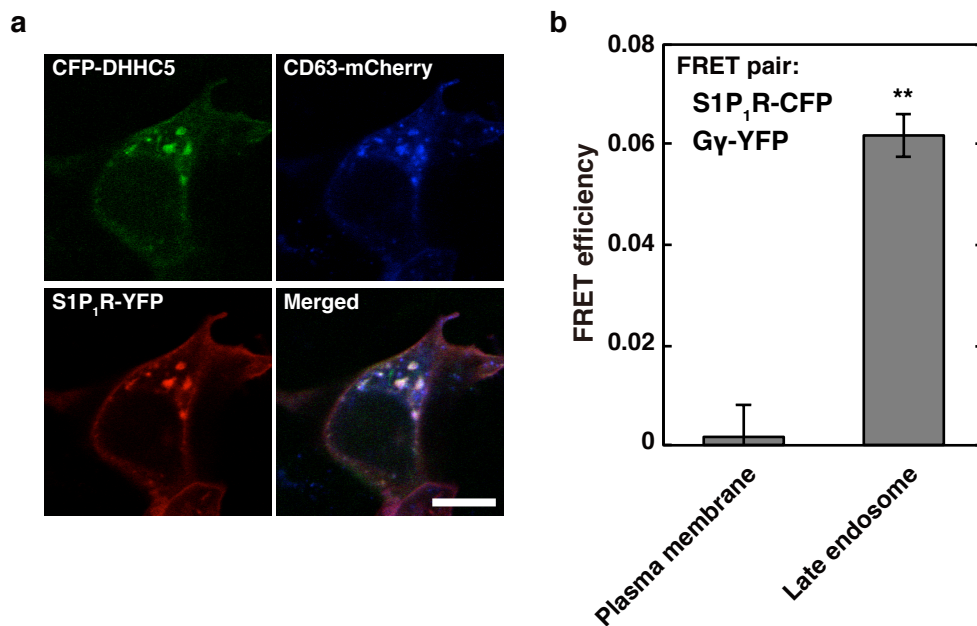

**Supplementary Figure 5. S1P-induced dissociation of DHHC5 from S1P<sub>1</sub>R in a time-dependent manner.**

(a) SH-SY5Y cells transiently expressing both S1P<sub>1</sub>R-YFP and CFP-DHHC5 were fixed and analysed for each fluorescence by confocal microscopy. One of the representative results from three independent experiments is shown.

(b) SH-SY5Y cells transiently transfected with a vector encoding S1P<sub>1</sub>R-CFP, Gβ, Gγ-YFP, Rab5 (Q79L)-DsRed and CD63-mCherry were cultured for 72 hr. After fixation, PM areas and CD63-positive enlarged vesicle areas were separately analysed for FRET efficiency using confocal microscopy. Values represent means ± s.e.m. of 3 independent experiments carried out in triplicate. Statistical significance was analysed by Student's t-test (\*\*P < 0.01 versus PM areas).

**a**

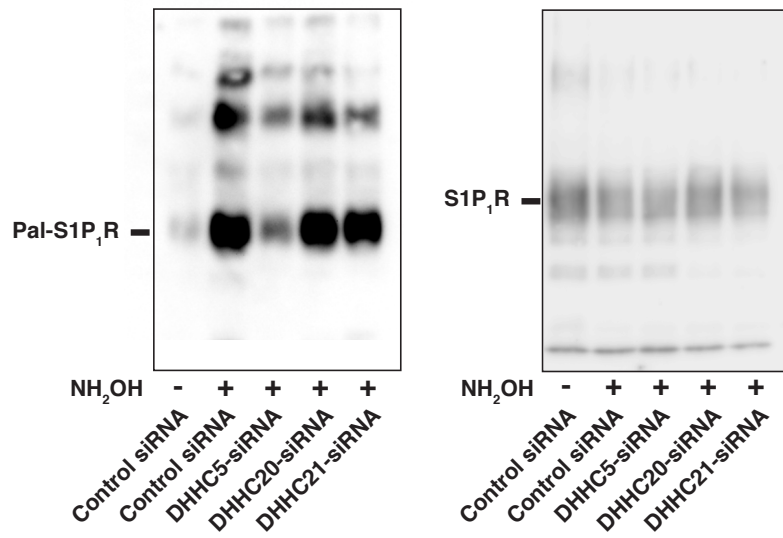

**b**

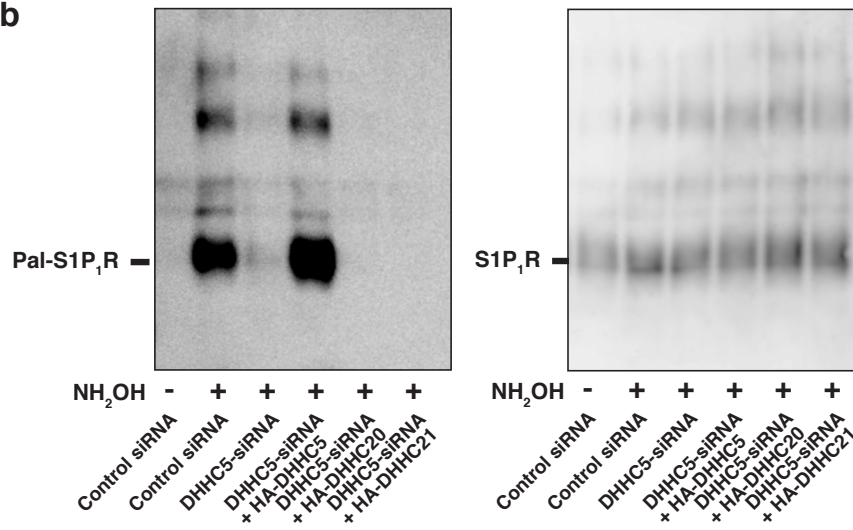

**c**

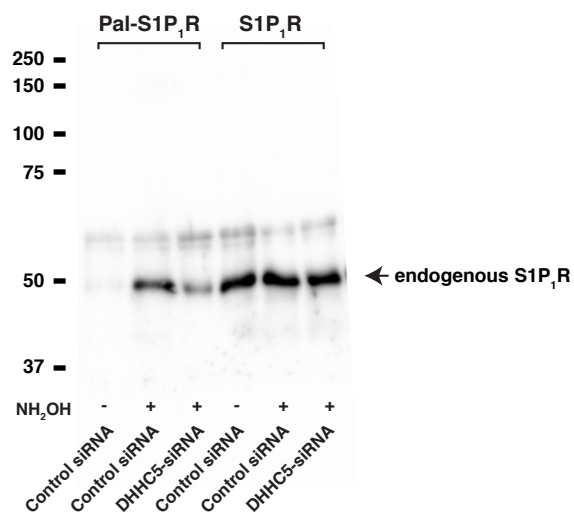

**Supplementary Figure 6. Full-length image of western blot analysis in Figure 1.**

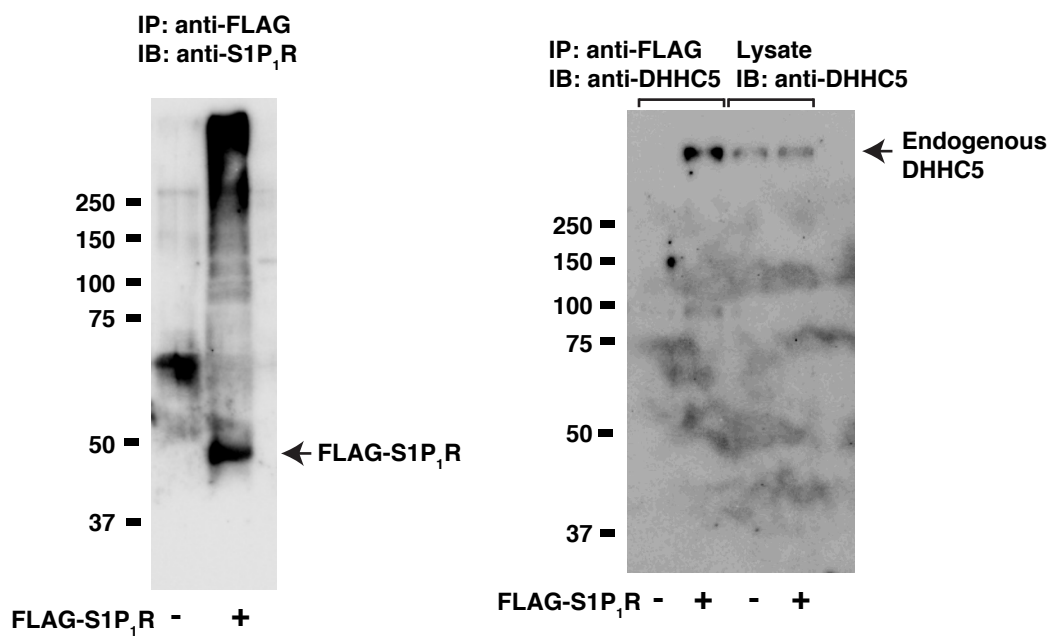

**Supplementary Figure 7. Full-length image of western blot analysis in Figure 2.**



**a****2-BP**Pal-S1P<sub>1</sub>R-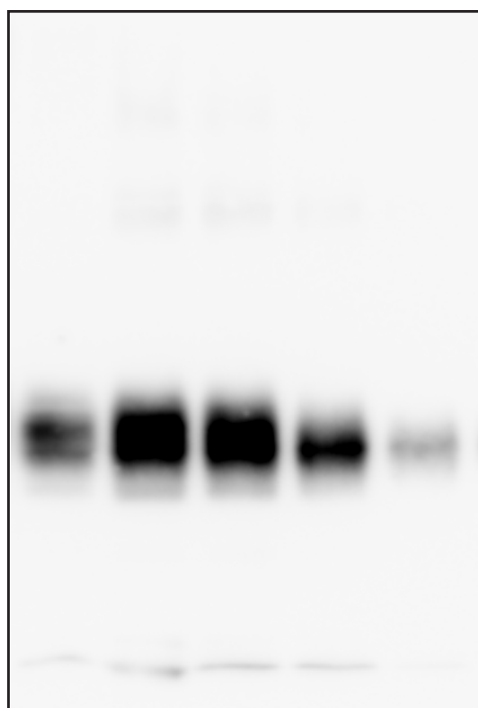

|                    |   |   |    |    |     |
|--------------------|---|---|----|----|-----|
| NH <sub>2</sub> OH | - | + | +  | +  | +   |
| Time (min)         | - | - | 30 | 60 | 120 |

Total S1P<sub>1</sub>R-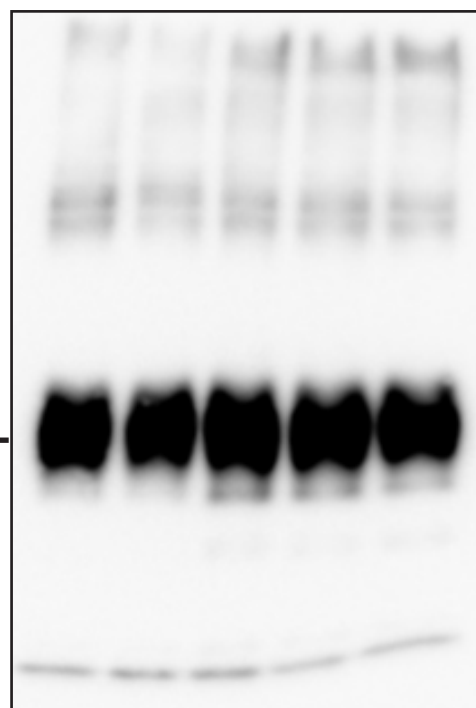

|                    |   |   |    |    |     |
|--------------------|---|---|----|----|-----|
| NH <sub>2</sub> OH | - | + | +  | +  | +   |
| Time (min)         | - | - | 30 | 60 | 120 |

**b****S1P**Pal-S1P<sub>1</sub>R-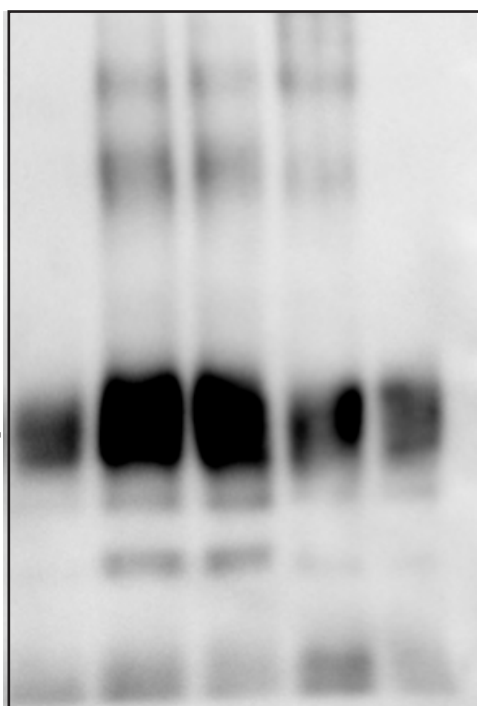

|                    |   |   |    |    |     |
|--------------------|---|---|----|----|-----|
| NH <sub>2</sub> OH | - | + | +  | +  | +   |
| Time (min)         | - | - | 30 | 60 | 120 |

Total S1P<sub>1</sub>R-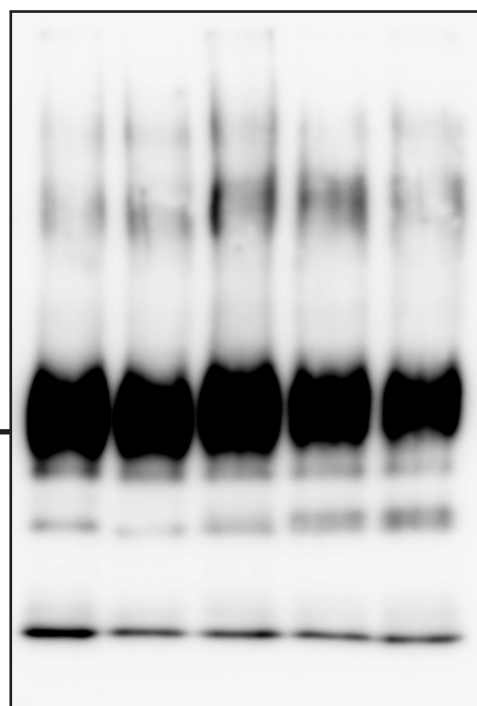

|                    |   |   |    |    |     |
|--------------------|---|---|----|----|-----|
| NH <sub>2</sub> OH | - | + | +  | +  | +   |
| Time (min)         | - | - | 30 | 60 | 120 |

Supplementary Figure 8. Full-length image of western blot analysis in Figure 4.

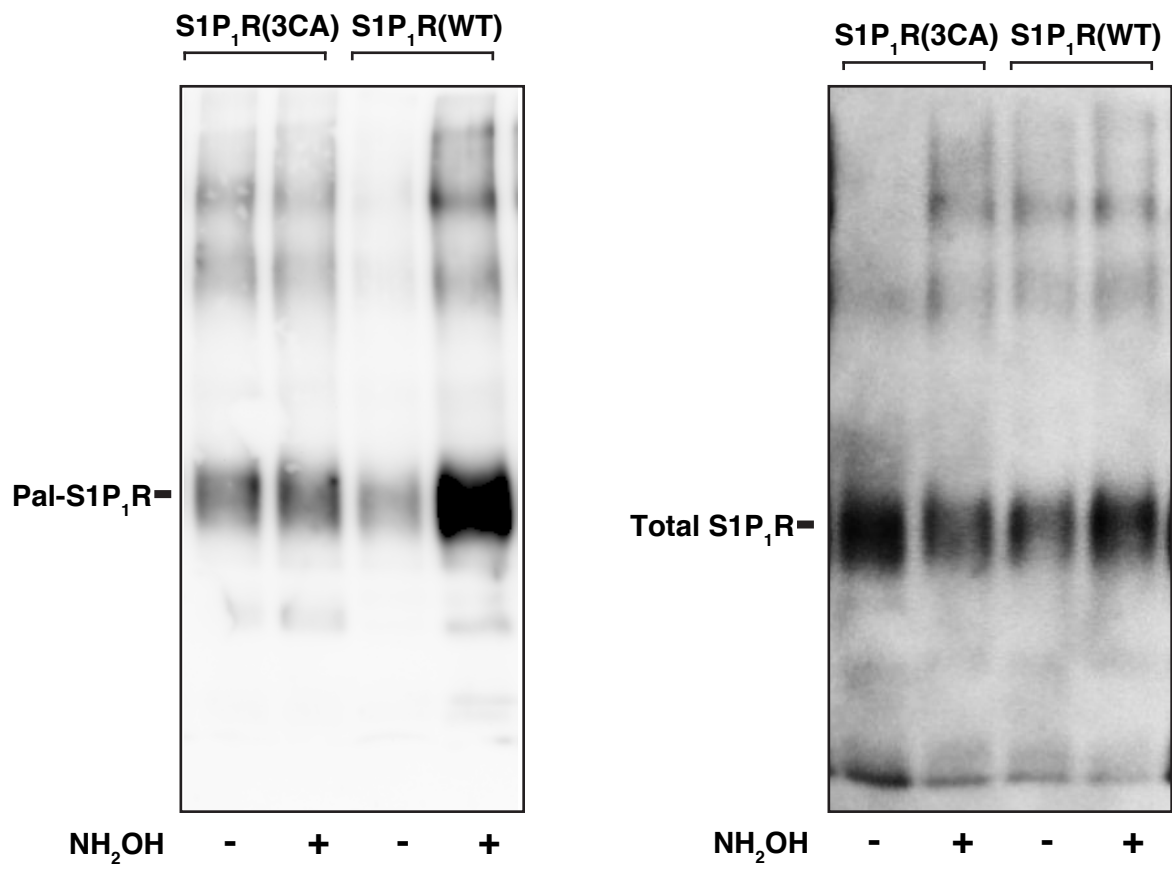

**Supplementary Figure 9. Full-length image of western blot analysis in Figure 5.**
